# Supplementary material for: New Benzimidazole-1,2,4-Triazole Hybrid Compounds: Synthesis, Anticandidal Activity and Cytotoxicity Evaluation
Source: MDPI journal article supplement (doi:10.3390/molecules22040507), 2017-03-27
Supplement: s1 [file s1]

# New Benzimidazole-1,2,4-Triazole Hybrid Compounds: Synthesis, Anticandidal Activity and Cytotoxicity Evaluation

Hülya Karaca Gençer , Ulviye Acar Çevik, Serkan Levent, Begüm Nurpelin Sağlık, Büşra Korkut, Yusuf Özkay, Sinem Ilgın, Yusuf Öztürk

Spectra for the most active compounds 5w and 5ad.

## DOPNALAB

| Item               | Value                                                  |
|--------------------|--------------------------------------------------------|
| Acquired Date&Time | 26.01.2017 11:24:21                                    |
| Acquired by        | System Administrator                                   |
| Filename           | C:\Users\dopnalab\Desktop\Serkan\tu serisi\tu-431.ispd |
| Spectrum name      | tu-431                                                 |
| Sample name        | tu-43                                                  |
| Sample ID          |                                                        |
| Option             |                                                        |
| Comment            |                                                        |
| No. of Scans       | 10                                                     |
| Resolution         | 4 [cm-1]                                               |
| Apodization        | Happ-Genzel                                            |

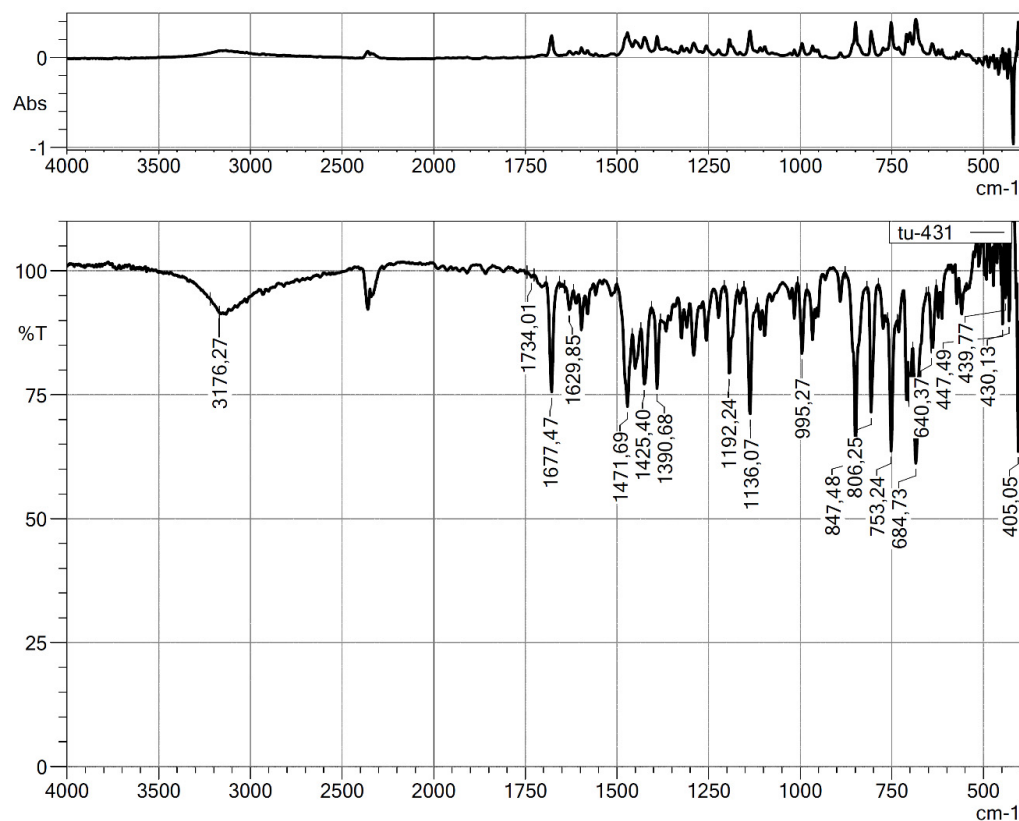

Figure SI-1. IR spectra of compound 5w.

Data File: C:\LabSolutions\Data\Analiz\lac\ TU-43\_61.lcd

| Elmt | Val. | Min | Max | Elmt | Val. | Min | Max | Elmt | Val. | Min | Max | Use Adduct |
|------|------|-----|-----|------|------|-----|-----|------|------|-----|-----|------------|
| H    | 1    | 17  | 19  | O    | 2    | 1   | 3   | Cl   | 1    | 0   | 3   | H          |
| C    | 4    | 22  | 40  | F    | 1    | 0   | 2   | Br   | 1    | 0   | 1   |            |
| N    | 3    | 5   | 6   | S    | 2    | 1   | 1   |      |      |     |     |            |

Error Margin (ppm): 5

DBE Range: 17.0 - 30.0

Electron Ions: both

HC Ratio: unlimited

Apply N Rule: yes

Use MSn Info: no

Max Isotopes: 3

Isotope RI (%): 1.00

Isotope Res: 10000

MSn Iso RI (%): 10.00

MSn Logic Mode: AND

Max Results: 500

Event#: 1 MS(E+) Ret. Time : 6.747 -&gt; 6.747 Scan# : 1013 -&gt; 1013

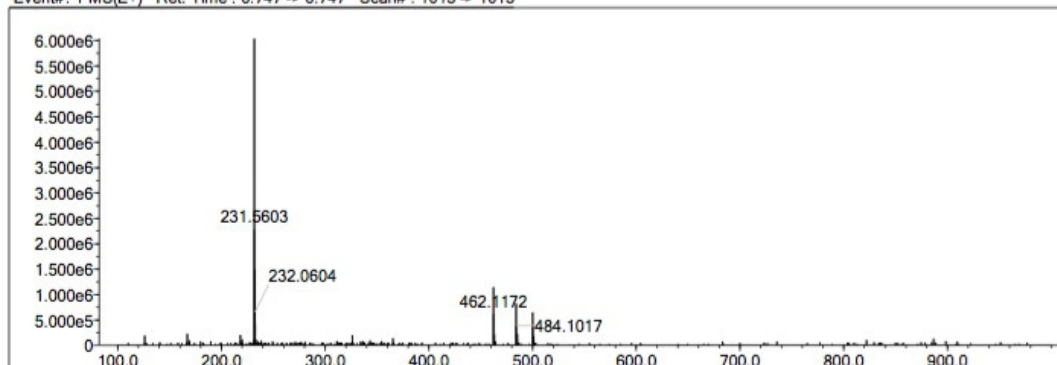

Measured region for 462.1172 m/z

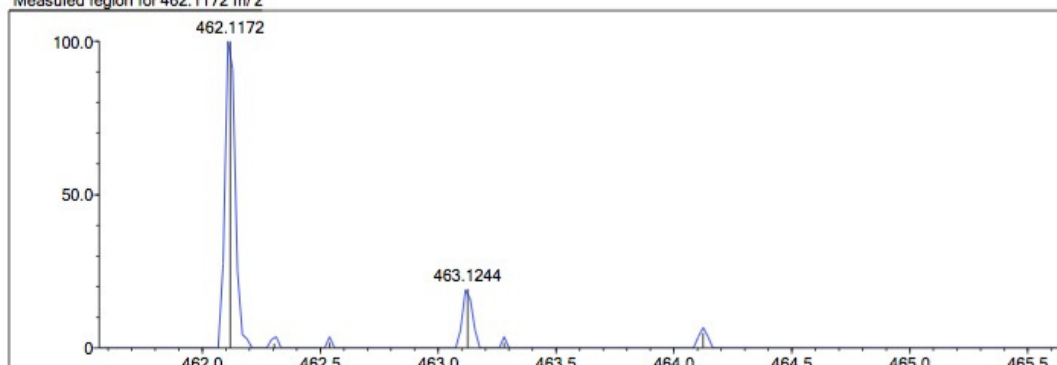C24 H17 N5 O F2 S [M+H]<sup>+</sup>: Predicted region for 462.1195 m/z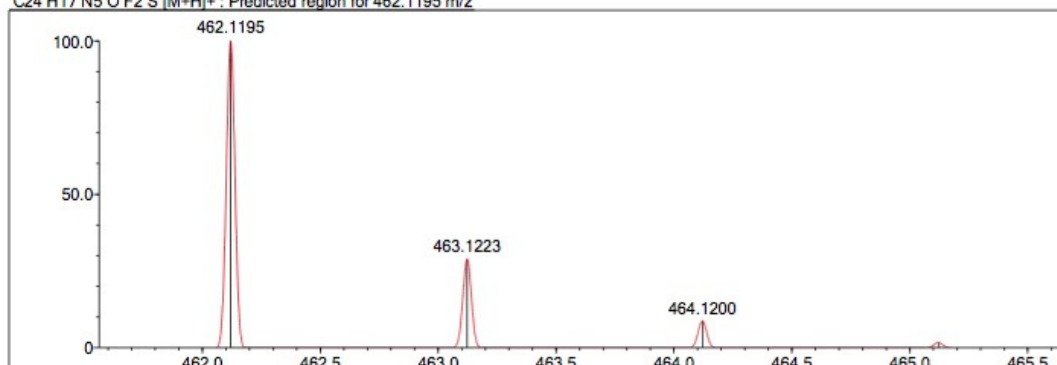

| Rank | Score | Formula (M)       | Ion                | Meas. m/z | Pred. m/z | Df. (mDa) | Df. (ppm) | Iso   | DBE  |
|------|-------|-------------------|--------------------|-----------|-----------|-----------|-----------|-------|------|
| 1    | 58.68 | C24 H17 N5 O F2 S | [M+H] <sup>+</sup> | 462.1172  | 462.1195  | -2.3      | -4.98     | 65.17 | 18.0 |

Figure SI-2. HRMS spectra of compound **5w**.

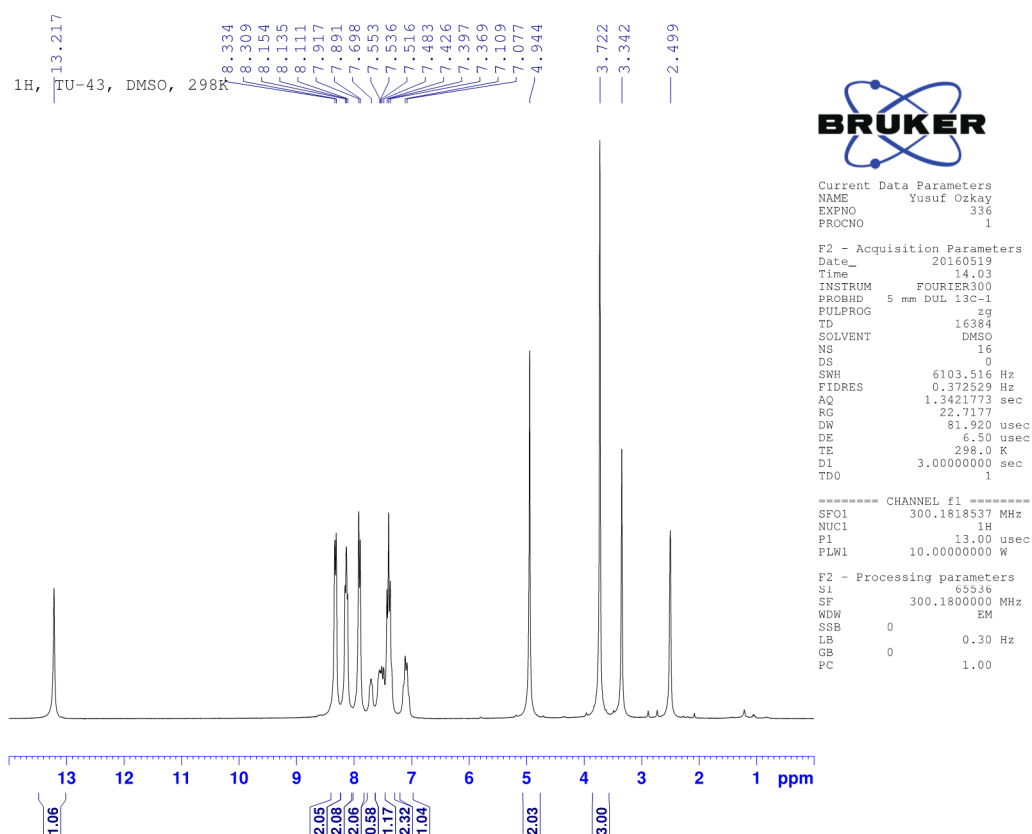

Figure SI-3. <sup>1</sup>H-NMR spectrum of compound **5w**.

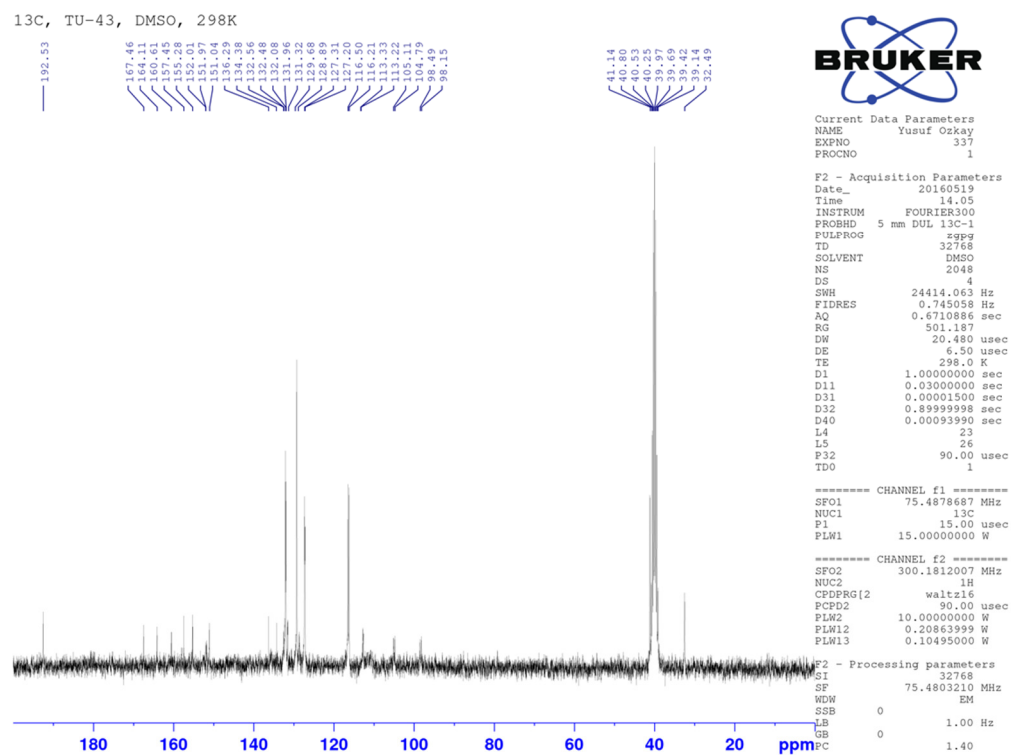

Figure SI-4. <sup>13</sup>C-NMR spectra of compound **5w**.

## DOPNALAB

| Item               | Value                                                  |
|--------------------|--------------------------------------------------------|
| Acquired Date&Time | 26.01.2017 11:45:58                                    |
| Acquired by        | System Administrator                                   |
| Filename           | C:\Users\dopnalab\Desktop\Serkan\tu serisi\tu-561.ispd |
| Spectrum name      | tu-561                                                 |
| Sample name        | tu-56                                                  |
| Sample ID          |                                                        |
| Option             |                                                        |
| Comment            |                                                        |
| No. of Scans       | 10                                                     |
| Resolution         | 4 [cm-1]                                               |
| Apodization        | Happ-Genzel                                            |

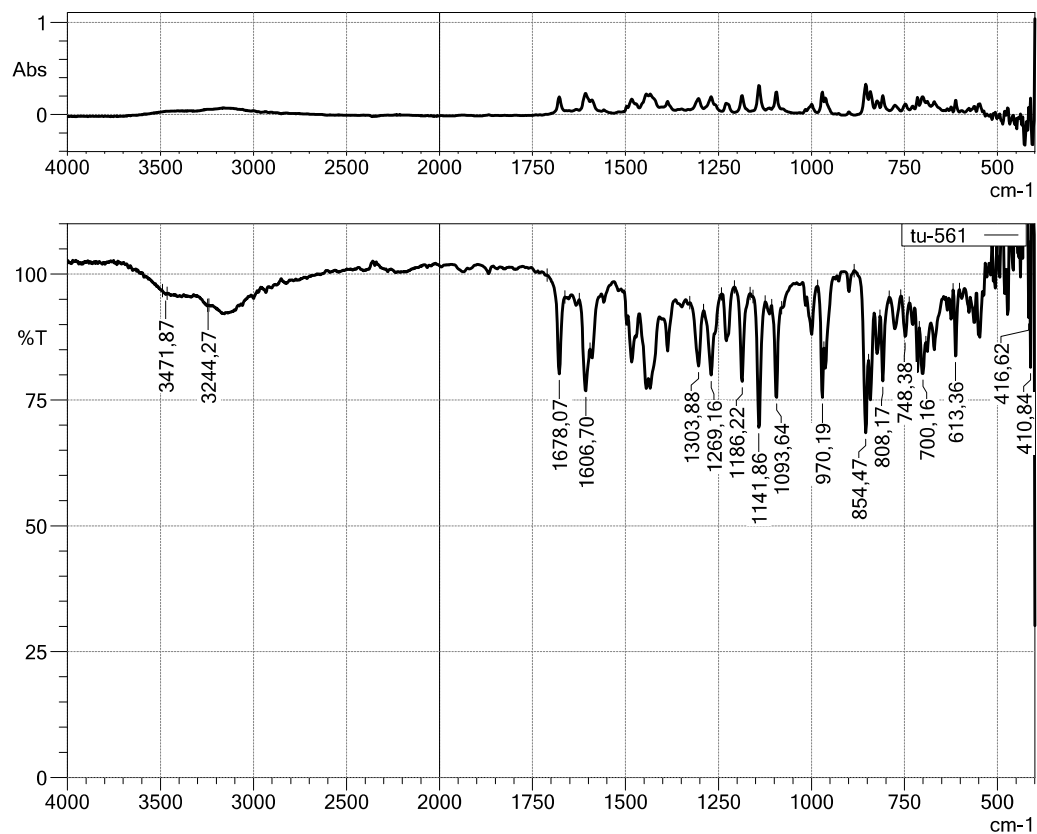

**Figure SI-5.** IR spectra of compound **5ad**.

Data File: C:\LabSolutions\Data\Analiz\aac\ TU-56\_77.lcd

| Elmt | Val. | Min | Max | Elmt | Val. | Min | Max | Elmt | Val. | Min | Max | Use Adduct |
|------|------|-----|-----|------|------|-----|-----|------|------|-----|-----|------------|
| H    | 1    | 15  | 25  | O    | 2    | 1   | 3   | Cl   | 1    | 0   | 3   | H          |
| C    | 4    | 22  | 40  | F    | 1    | 0   | 3   | Br   | 1    | 0   | 1   |            |
| N    | 3    | 5   | 6   | S    | 2    | 1   | 1   |      |      |     |     |            |

Error Margin (ppm): 5

DBE Range: 17.0 - 21.0

Electron Ions: both

HC Ratio: unlimited

Apply N Rule: yes

Use MSn Info: no

Max Isotopes: 3

Isotope RI (%): 1.00

Isotope Res: 10000

MSn Iso RI (%): 10.00

MSn Logic Mode: AND

Max Results: 500

Event#: 1 MS(E+) Ret. Time : 6.880 -&gt; 6.880 Scan# : 1033 -&gt; 1033

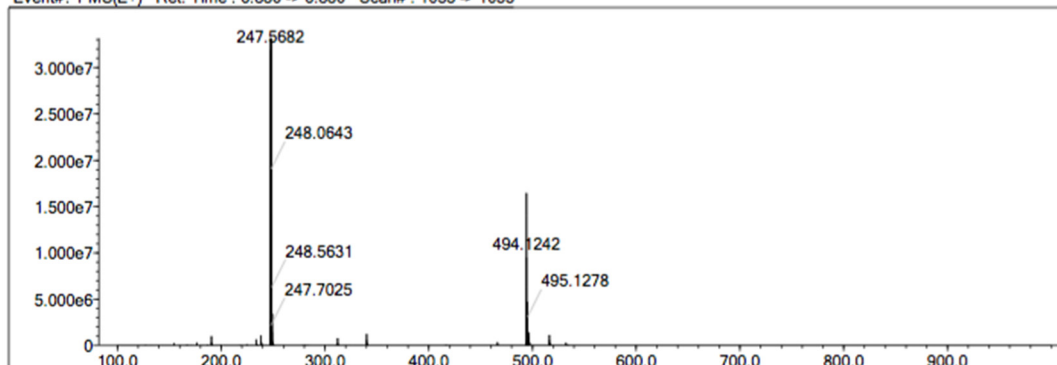

Measured region for 494.1242 m/z

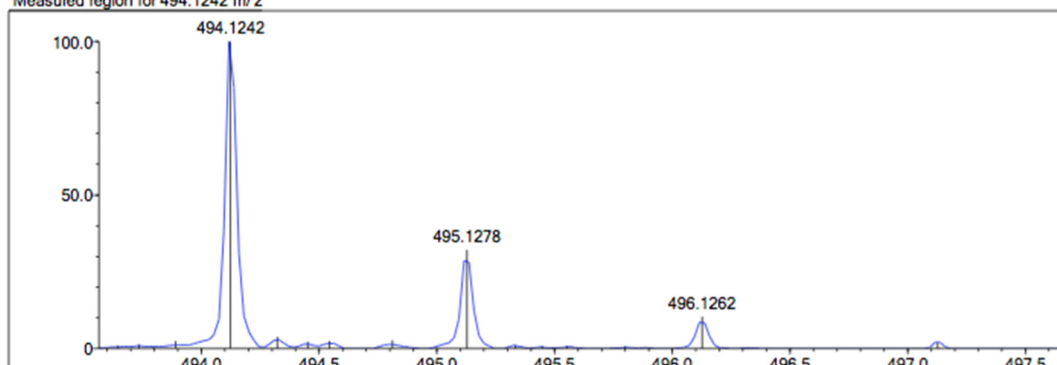C25 H18 N5 O F3 S [M+H]<sup>+</sup> : Predicted region for 494.1257 m/z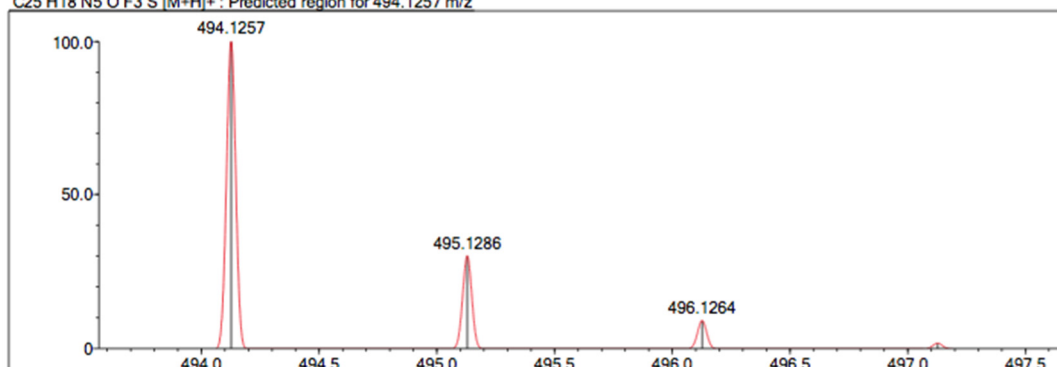

| Rank | Score | Formula (M)       | Ion                | Meas. m/z | Pred. m/z | Df. (mDa) | Df. (ppm) | Iso   | DBE  |
|------|-------|-------------------|--------------------|-----------|-----------|-----------|-----------|-------|------|
| 1    | 84.53 | C25 H18 N5 O F3 S | [M+H] <sup>+</sup> | 494.1242  | 494.1257  | -1.5      | -3.04     | 89.07 | 18.0 |

Figure SI-6. HRMS spectra of compound **5ad**.

<sup>1</sup>H, TU-56, DMSO, 298K

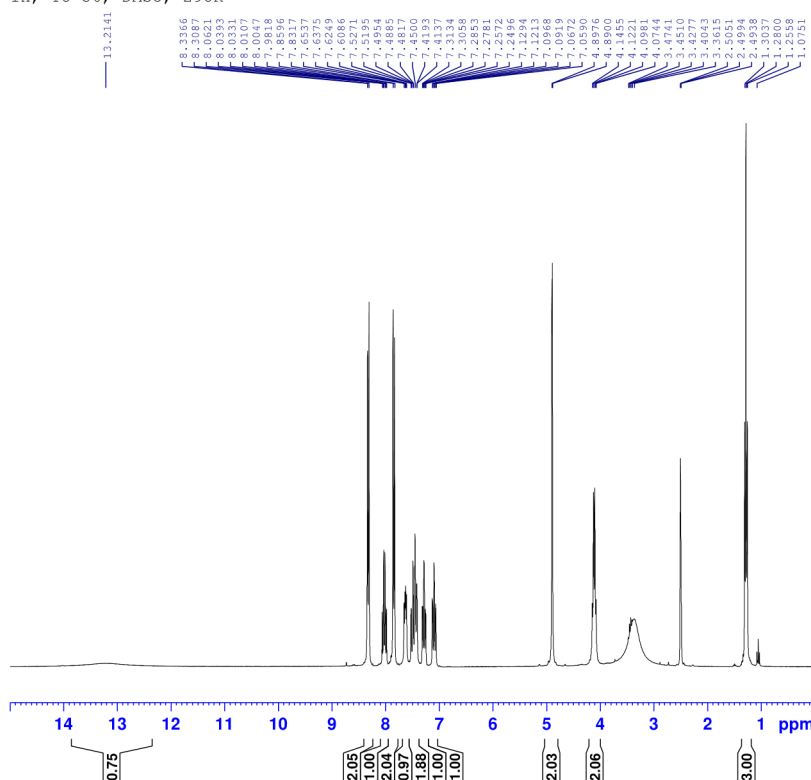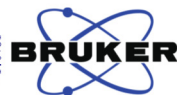

Current Data Parameters  
NAME Yusuf Ozkay  
EXPNO 360  
PROCNO 1

F2 - Acquisition Parameters  
Date\_ 20160521  
Time 14.05  
INSTRUM FOURIER300  
PROBHD 5 mm DUL 13C-1  
PULPROG zg  
TD 16384  
SOLVENT DMSO  
NS 16  
DS 0  
SWH 6103.516 Hz  
FIDRES 0.372529 Hz  
AQ 1.3421773 sec  
RG 17.162  
DW 81.920 usec  
DE 6.50 usec  
TE 297.9 K  
D1 3.00000000 sec  
TD0 1

===== CHANNEL f1 =====  
SFO1 300.1818537 MHz  
NUC1 <sup>1</sup>H  
P1 13.00 usec  
PLW1 10.00000000 W

F2 - Processing parameters  
SI 65536  
SF 300.1800000 MHz  
WDW EM  
SSB 0  
LB 0.30 Hz  
GB 0  
PC 1.00

Figure SI-7. <sup>1</sup>H-NMR spectrum of compound **5ad**.

<sup>13</sup>C, TU-56, DMSO, 298K

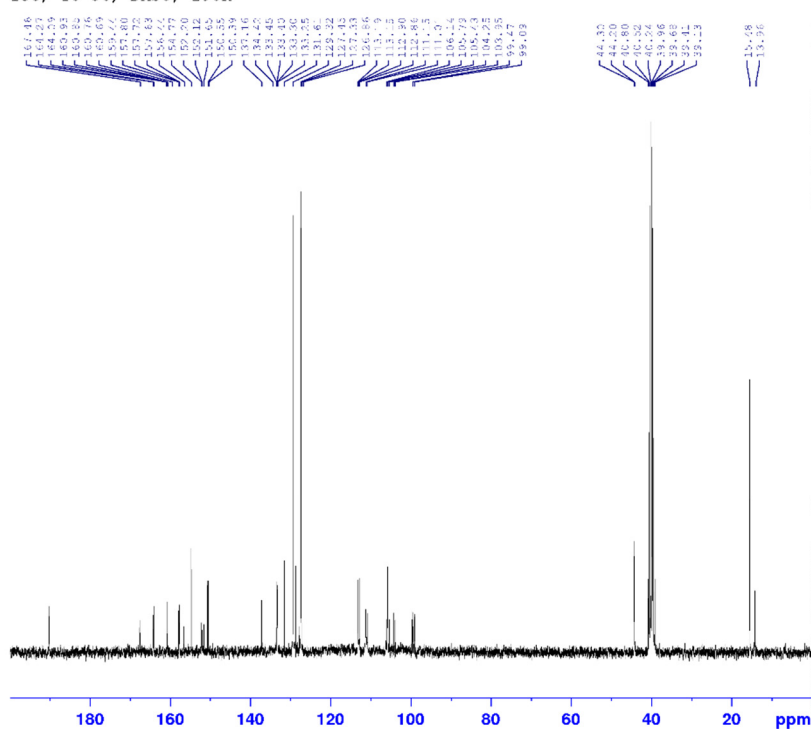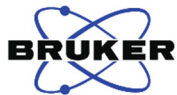

Current Data Parameters  
NAME Yusuf Ozkay  
EXPNO 361  
PROCNO 1

F2 - Acquisition Parameters  
Date\_ 20160521  
Time 4.07  
INSTRUM FOURIER300  
PROBHD 5 mm DUL 13C-1  
PULPROG zgpg  
TD 32768  
SOLVENT DMSO  
NS 7648  
DS 0  
SWH 24414.063 Hz  
FIDRES 0.745358 Hz  
AQ 0.6710386 sec  
RG 501.87  
DW 20.480 usec  
DE 6.50 usec  
TE 297.9 K  
D1 1.00000000 sec  
D11 0.30000000 sec  
D12 0.30001500 sec  
D32 0.89999998 sec  
D40 0.00033990 sec  
L4 23  
L5 25  
P32 90.00 usec  
TD0 1

===== CHANNEL f1 =====  
SFO1 75.4878687 MHz  
NUC1 <sup>13</sup>C  
P1 15.00 usec  
PLW1 15.00000000 W

===== CHANNEL f2 =====  
SFO2 300.1812007 MHz  
NUC2 <sup>1</sup>H  
TD0RG[2] 8816.6  
FIDRES 0.30000000 sec  
P1 10.00000000 W  
PLW2 0.20863999 W  
PLW3 0.10495000 W

F2 - Processing parameters  
SI 32768  
SF 75.4803210 MHz  
WDW EM  
SSB 0  
LB 1.00 Hz  
GB 0  
PC 1.40

Figure SI-8. <sup>13</sup>C-NMR spectra of compound **5ad**.
